# Supplementary material
Source: PubMed Central journal article supplement (PMC4685552)
Supplement: rsbl20150874supp1.pdf [file rsbl20150874supp1.pdf]

## **Figure captions**

S1. Larger of the two pools that make up Coco di sa Bova.

S2. One of the three permanent water bodies that make up Torrent de Ferrerets.

S3. A pool prepared for treatment with Virkon S after draining most of the water and collecting every tadpole.

S4. A pool after treatment with Virkon S.



S1

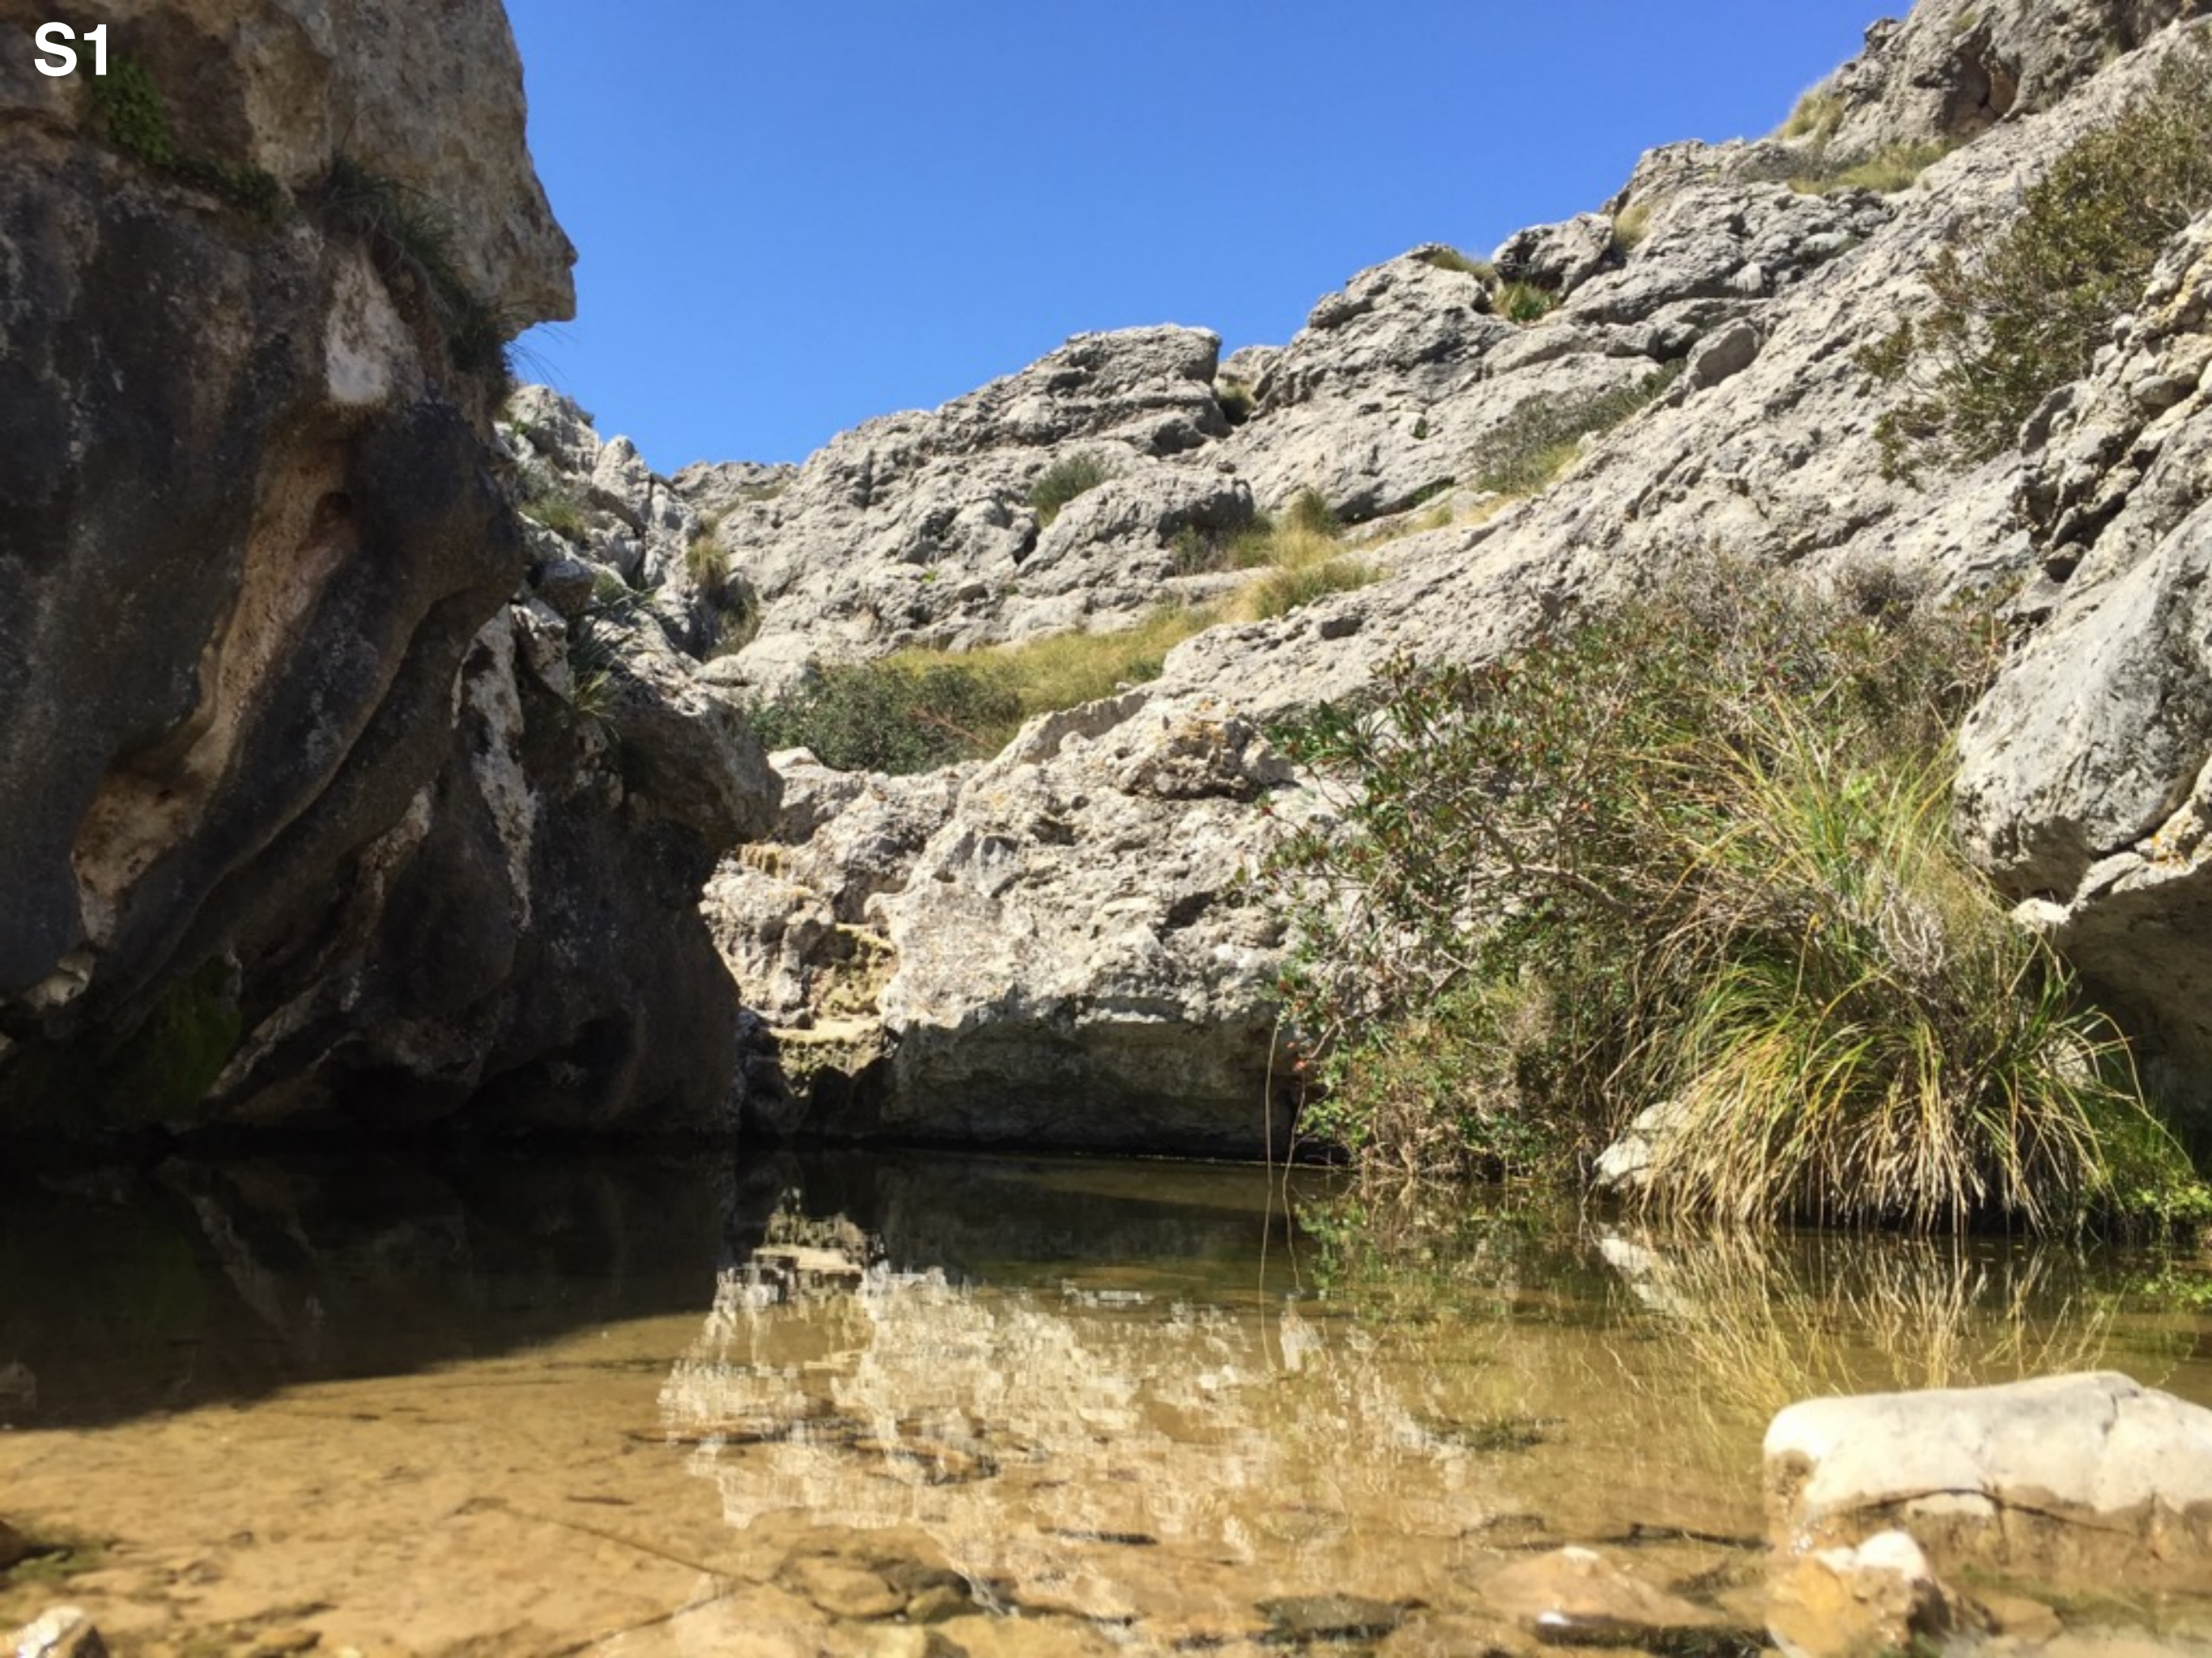



S2

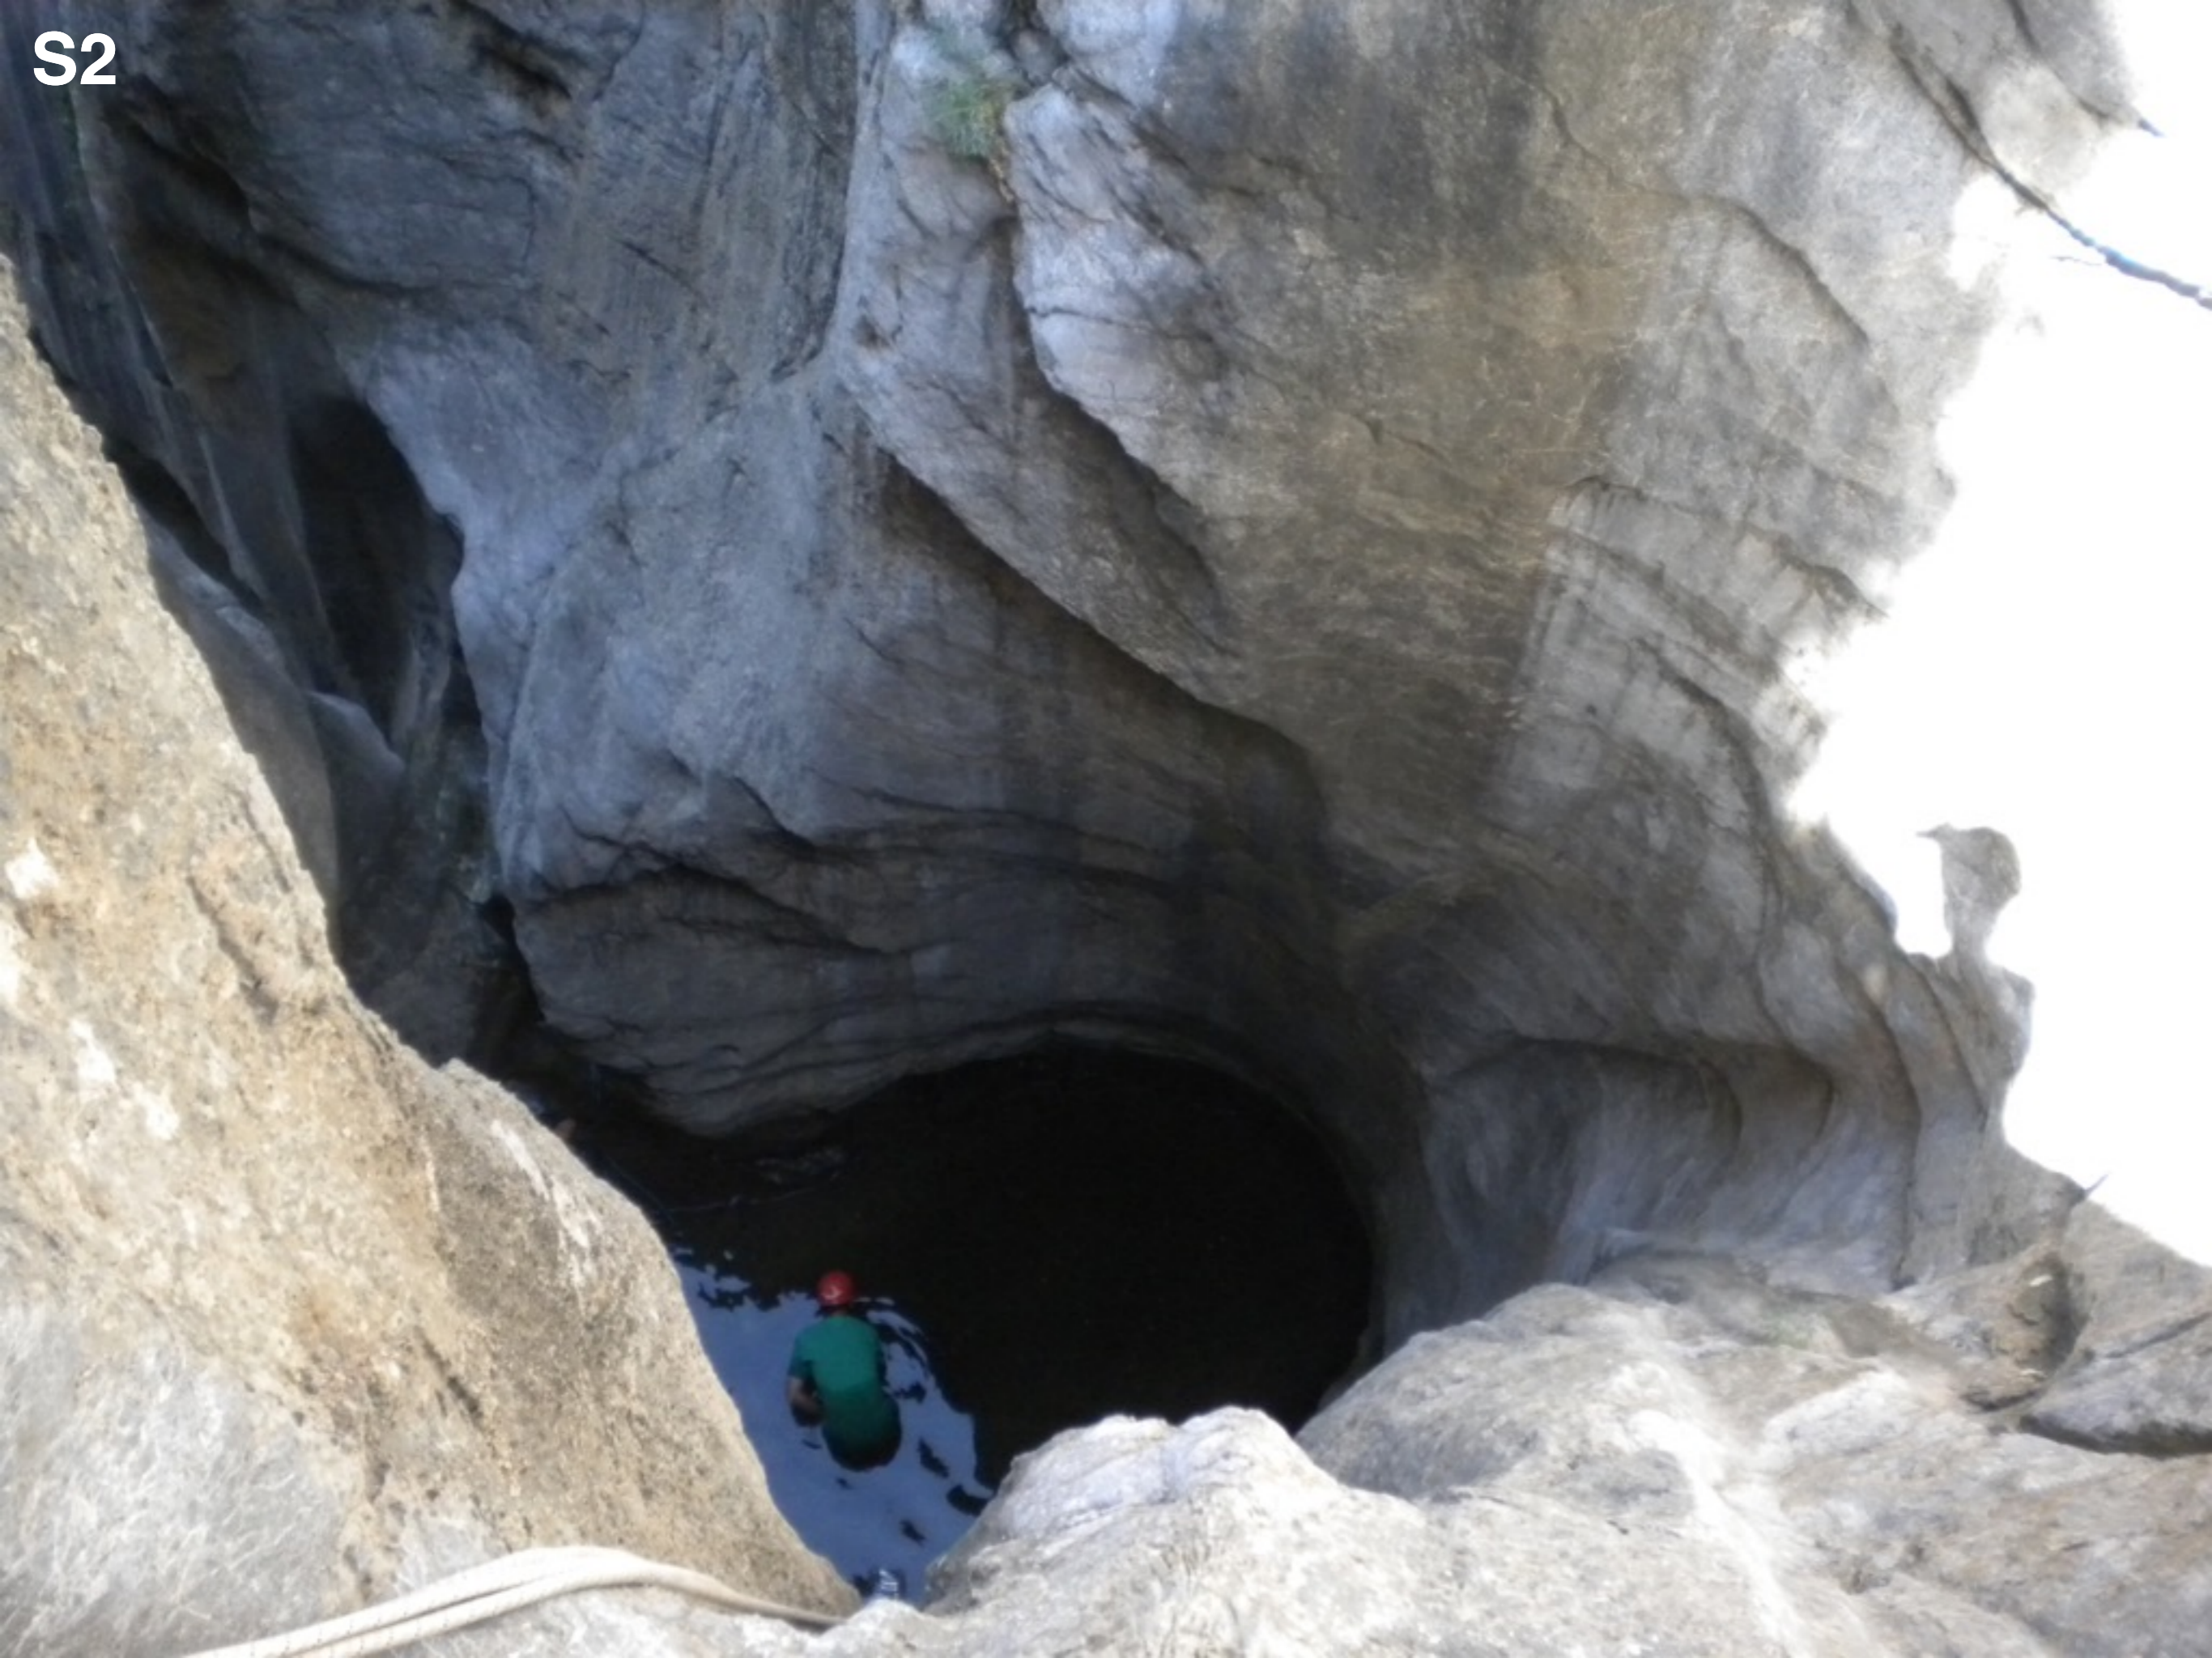



S3

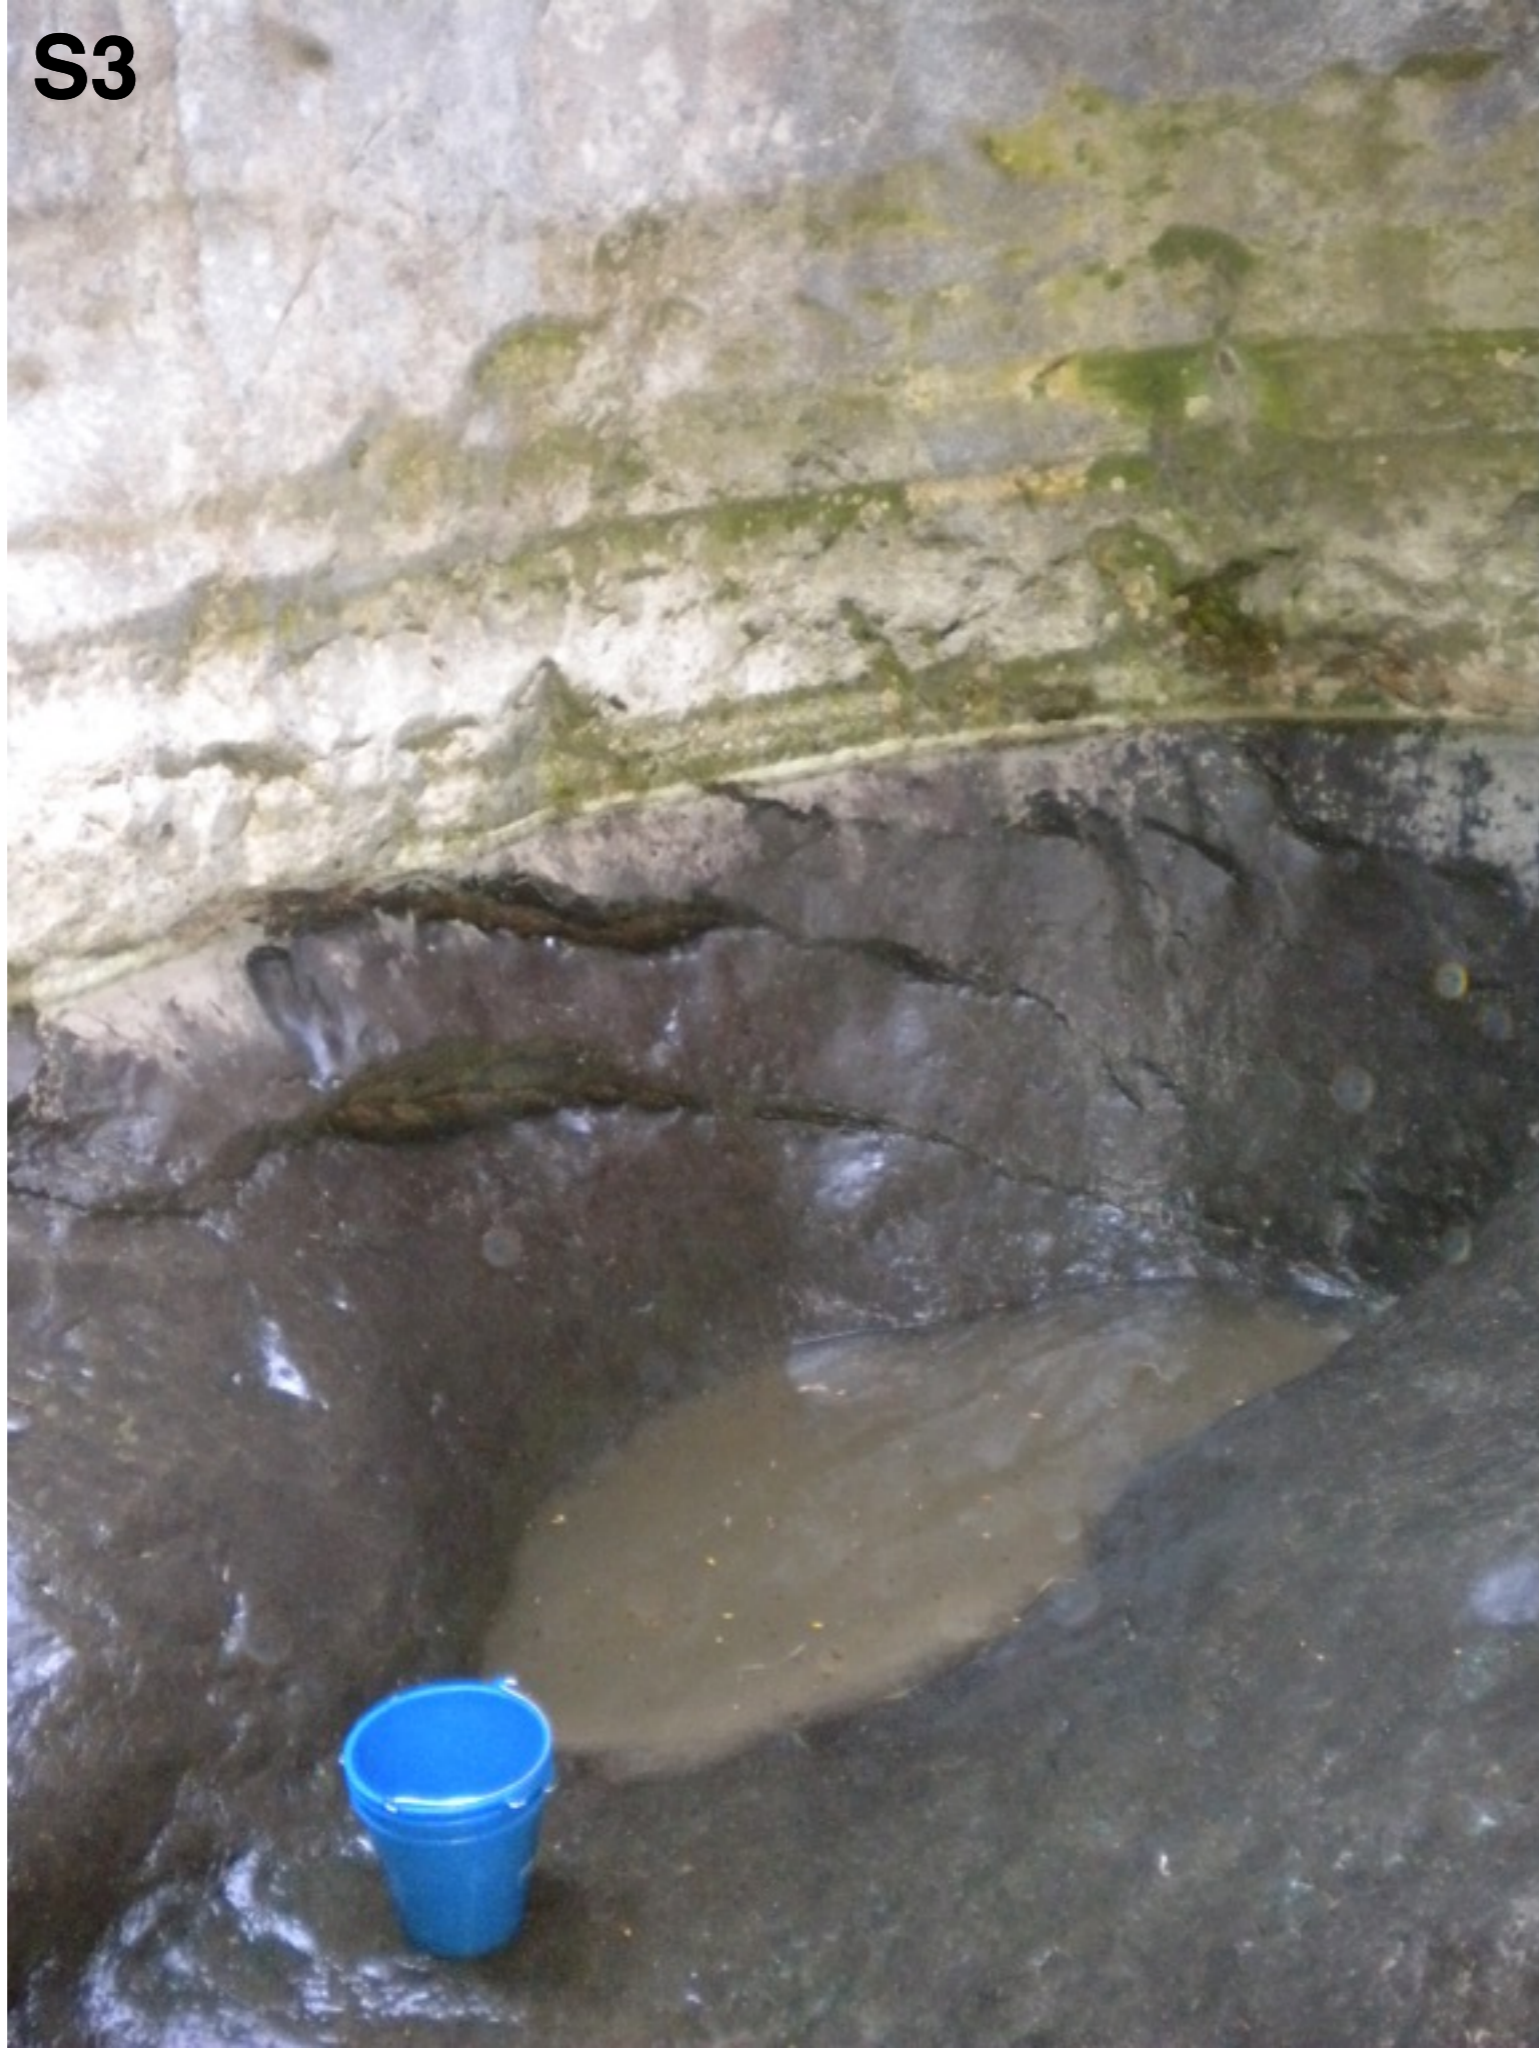



S4

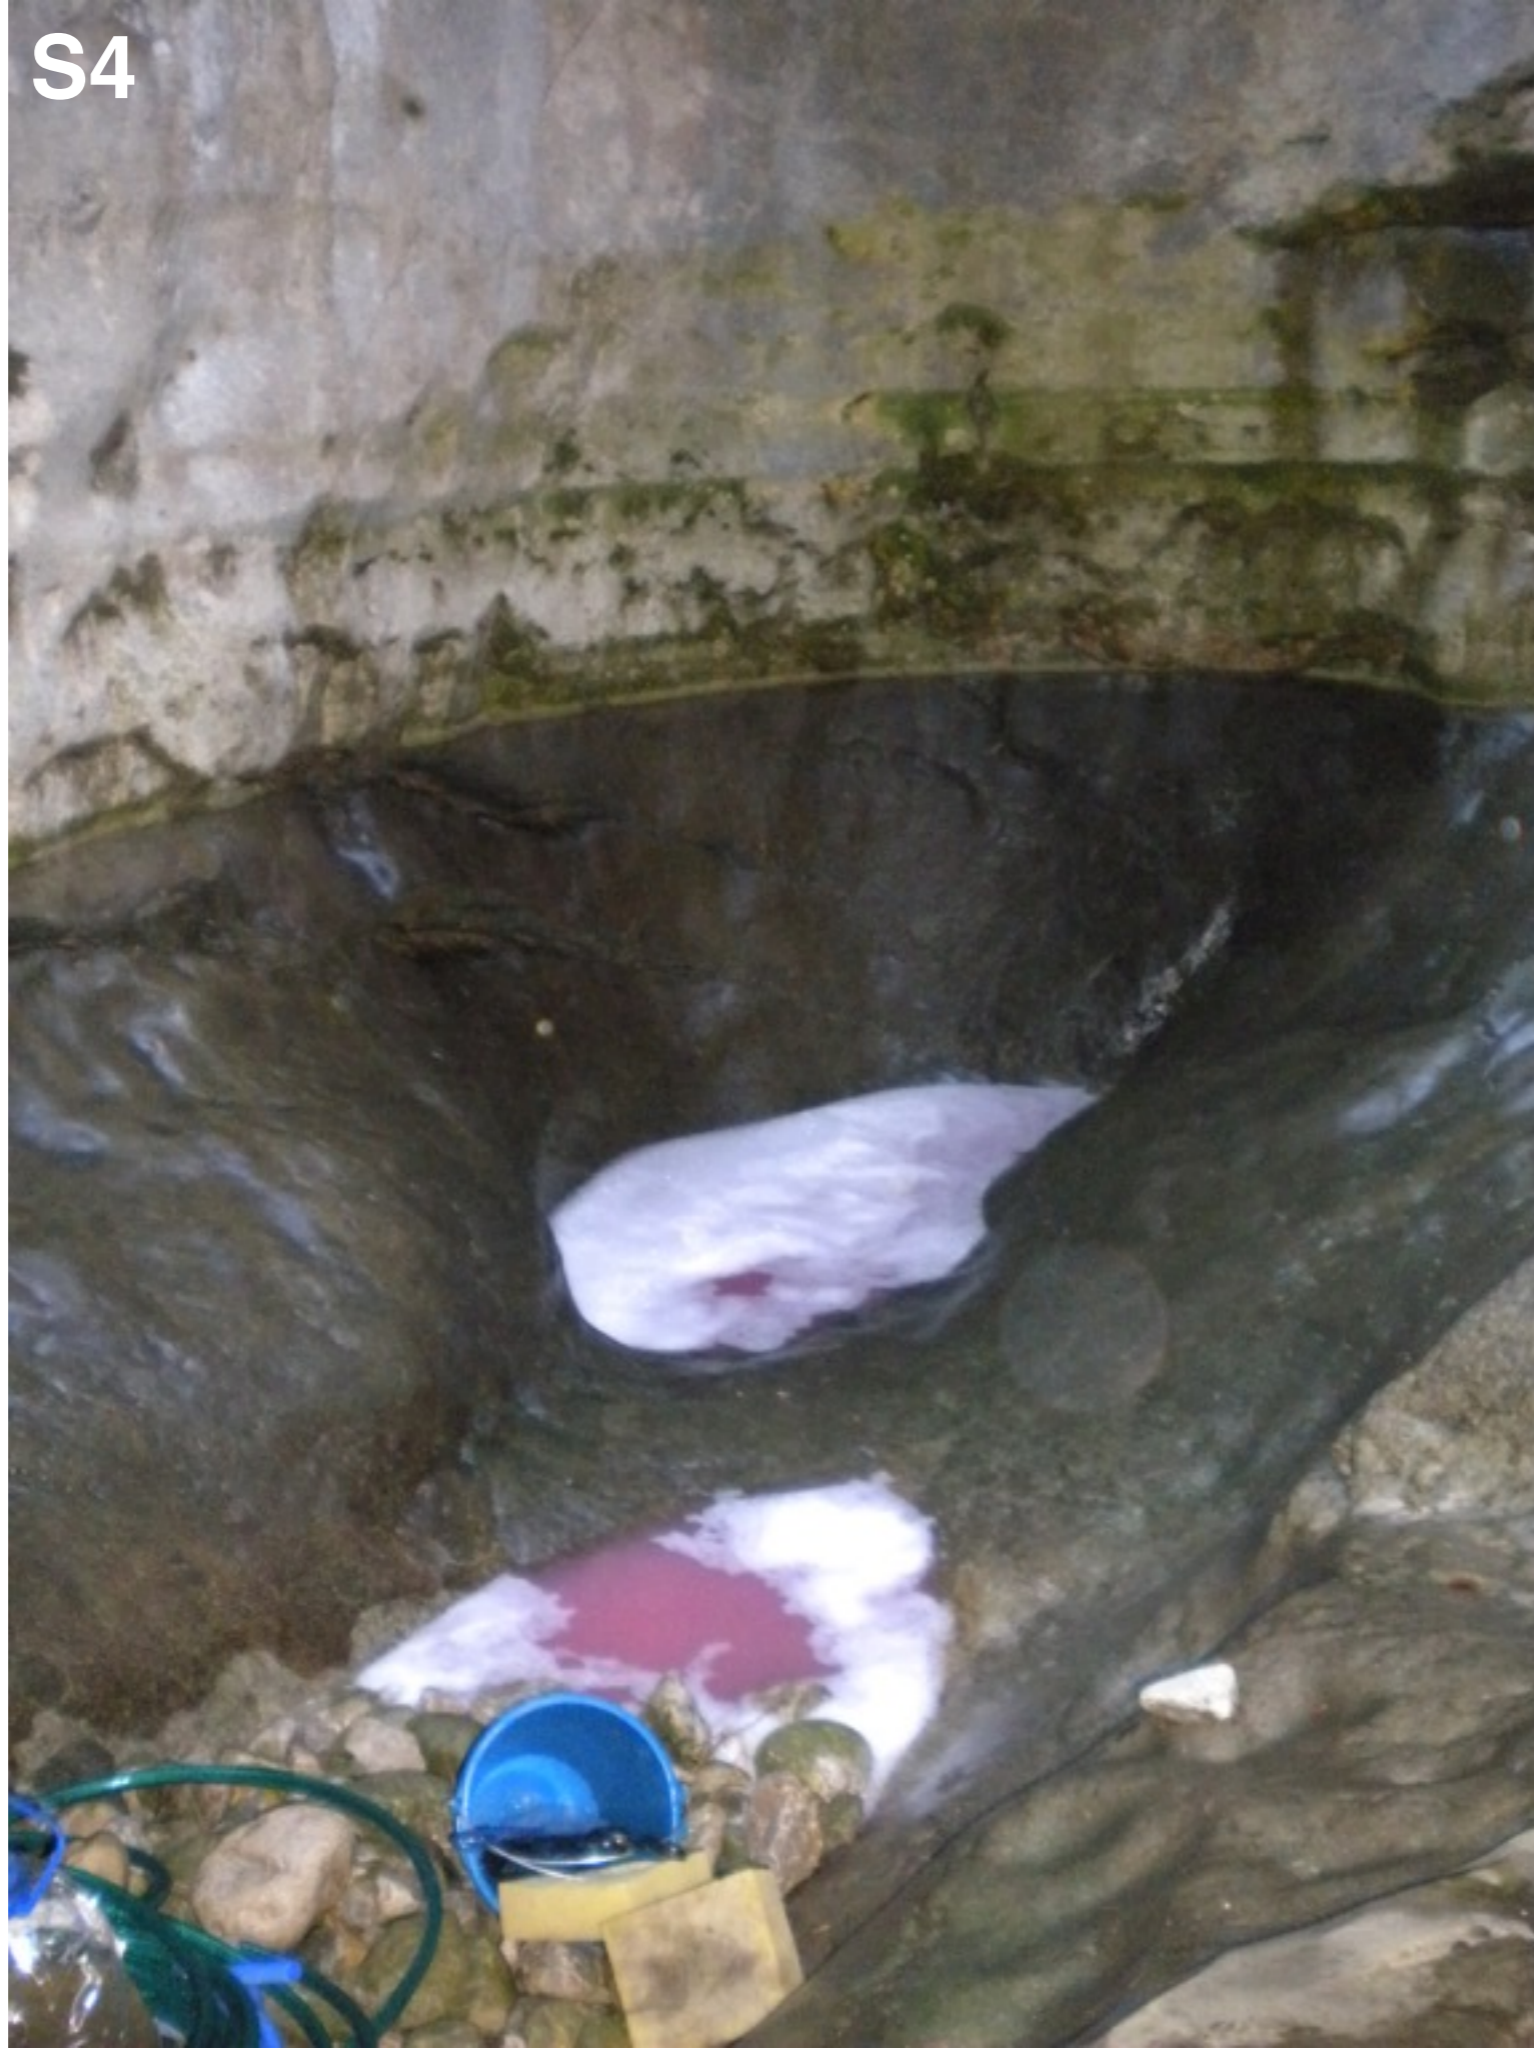

## Cocó de sa Bova

| SUM08  | SPR09  | SUM09 | SPR10 | SUM10 | SPR11 | SUM11 | SPR12 | SUM12 | SPR13  | SPR14 |
|--------|--------|-------|-------|-------|-------|-------|-------|-------|--------|-------|
| 0.0    | 5.5    | 0.0   | 5.0   | 0.3   | 0.5   | 0.0   | 1.9   | 0.0   | 0.0    | 0.0   |
| 0.0    | 34.5   | 0.0   | 7.3   | 0.4   | 1.3   | 0.0   | 2.6   | 0.0   | 0.0    | 0.0   |
| 0.0    | 40.3   | 0.0   | 8.5   | 11.0  | 10.1  | 0.0   | 3.1   | 0.0   | 5.5    | 0.0   |
| 0.0    | 79.2   | 0.0   | 17.7  | 14.2  | 40.0  | 0.4   | 4.4   | 0.0   | 8.6    | 0.0   |
| 0.0    | 114.6  | 0.0   | 22.7  | 16.8  | 4.0   | 1.3   | 4.6   | 0.0   | 30.0   | 0.0   |
| 0.0    | 119.6  | 0.0   | 53.8  | 23.2  | 13.0  | 0.6   | 5.5   | 0.0   | 70.0   | 0.0   |
| 0.0    | 137.8  | 0.1   | 60.1  | 29.1  | 83.0  | 2.6   | 5.5   | 0.0   | 200.0  | 0.0   |
| 2.9    | 199.8  | 0.2   | 63.1  | 41.4  | 29.0  | 3.1   | 6.2   | 0.0   | 210.0  | 0.0   |
| 4.2    | 227.5  | 0.7   | 64.8  | 48.8  | 32.0  | 3.2   | 7.0   | 0.0   | 228.7  | 0.0   |
| 4.5    | 259.5  | 1.1   | 68.2  | 51.7  | 9.0   | 3.7   | 8.0   | 0.0   | 270.0  | 0.0   |
| 5.2    | 280.8  | 1.1   | 74.2  | 53.2  | 48.0  | 4.2   | 8.2   | 0.2   | 320.0  | 0.0   |
| 6.3    | 306.0  | 1.4   | 80.3  | 54.6  | 171.0 | 4.2   | 9.4   | 0.0   | 380.0  | 0.0   |
| 6.9    | 309.4  | 2.2   | 84.6  | 58.6  | 58.0  | 5.8   | 10.3  | 0.0   | 490.0  | 0.0   |
| 7.2    | 422.5  | 4.9   | 99.6  | 62.5  | 19.0  | 10.0  | 10.6  | 0.0   | 740.0  | 0.0   |
| 34.0   | 455.2  | 5.7   | 133.8 | 65.1  | 12.5  | 10.0  | 12.5  | 0.0   | 990.0  | 0.0   |
| 49.4   | 461.2  | 8.7   | 140.0 | 68.0  | 142.0 | 20.0  | 15.3  | 0.0   | 1900.0 | 0.0   |
| 85.0   | 489.7  | 26.9  | 150.6 | 72.7  | 0.0   | 22.4  | 19.9  | 0.0   | 2370.0 | 0.0   |
| 221.4  | 509.2  | 29.6  | 157.8 | 73.3  | 99.0  | 30.0  | 20.4  | 0.1   | 2558.9 | 0.0   |
| 1123.1 | 523.3  |       | 167.5 | 73.5  | 45.8  | 260.0 | 21.4  |       | 3150.0 | 0.0   |
| 2261.9 | 1125.1 |       | 198.2 | 267.0 | 39.6  |       | 22.5  |       | 3370.0 | 0.0   |
|        |        |       | 221.9 | 0.4   |       |       | 23.4  |       |        | 0.0   |
|        |        |       | 226.8 | 3.2   |       |       | 31.5  |       |        | 0.0   |
|        |        |       | 252.6 | 3.2   |       |       | 39.1  |       |        | 0.0   |
|        |        |       | 260.0 | 22.7  |       |       | 40.2  |       |        | 0.0   |
|        |        |       | 270.3 | 25.2  |       |       | 41.0  |       |        | 0.0   |
|        |        |       | 283.7 | 27.3  |       |       | 41.0  |       |        | 0.0   |
|        |        |       | 292.8 | 31.4  |       |       | 42.6  |       |        | 0.0   |
|        |        |       | 535.6 | 34.3  |       |       | 43.2  |       |        | 0.0   |
|        |        |       | 560.0 | 34.8  |       |       | 43.9  |       |        | 0.0   |
|        |        |       | 788.9 | 39.4  |       |       | 44.6  |       |        | 0.0   |
|        |        |       |       | 73.8  |       |       | 52.5  |       |        | 30.0  |
|        |        |       |       | 93.6  |       |       | 55.9  |       |        | 100.0 |
|        |        |       |       | 98.1  |       |       | 58.3  |       |        |       |
|        |        |       |       | 106.4 |       |       | 59.6  |       |        |       |
|        |        |       |       | 112.8 |       |       | 60.6  |       |        |       |
|        |        |       |       | 146.9 |       |       | 60.6  |       |        |       |
|        |        |       |       | 152.8 |       |       | 66.4  |       |        |       |
|        |        |       |       | 213.2 |       |       | 77.5  |       |        |       |
|        |        |       |       | 284.1 |       |       | 80.1  |       |        |       |
|        |        |       |       | 471.3 |       |       | 80.3  |       |        |       |
|        |        |       |       |       |       |       | 83.8  |       |        |       |
|        |        |       |       |       |       |       | 85.8  |       |        |       |
|        |        |       |       |       |       |       | 88.2  |       |        |       |
|        |        |       |       |       |       |       | 94.3  |       |        |       |
|        |        |       |       |       |       |       | 94.5  |       |        |       |
|        |        |       |       |       |       |       | 100.0 |       |        |       |
|        |        |       |       |       |       |       | 102.4 |       |        |       |
|        |        |       |       |       |       |       | 106.9 |       |        |       |
|        |        |       |       |       |       |       | 120.2 |       |        |       |
|        |        |       |       |       |       |       | 134.3 |       |        |       |
|        |        |       |       |       |       |       | 137.1 |       |        |       |
|        |        |       |       |       |       |       | 138.1 |       |        |       |
|        |        |       |       |       |       |       | 147.7 |       |        |       |
|        |        |       |       |       |       |       | 148.6 |       |        |       |
|        |        |       |       |       |       |       | 151.9 |       |        |       |
|        |        |       |       |       |       |       | 153.0 |       |        |       |
|        |        |       |       |       |       |       | 153.2 |       |        |       |
|        |        |       |       |       |       |       | 175.0 |       |        |       |
|        |        |       |       |       |       |       | 572.2 |       |        |       |

## Torrent des Ferrerets

| <b>SPR06</b> | <b>SPR08</b> | <b>SUM09</b> | <b>SPR10</b> | <b>SPR12</b> | <b>SPR14</b> | <b>SUM14</b> |
|--------------|--------------|--------------|--------------|--------------|--------------|--------------|
| 228.9        | 2.9          | 666.6        | 0.0          | 0.0          | 0.0          | 0.0          |
| 109.5        | 4.2          | 645.3        | 0.0          | 0.0          | 0.0          | 0.0          |
| 320.4        | 4.5          | 383.8        | 0.0          | 0.1          | 0.0          | 0.0          |
| 563.1        | 5.2          | 382.6        | 0.0          | 0.1          | 0.0          | 0.0          |
| 968.8        | 6.3          | 301.4        | 0.0          | 0.1          | 0.0          | 0.0          |
| 552.4        | 6.9          | 125.8        | 0.0          | 0.3          | 0.0          | 0.0          |
| 68.3         | 7.2          | 118.2        | 0.4          | 0.6          | 0.0          | 0.0          |
| 190.9        | 18.6         | 75.4         | 0.5          | 0.8          | 0.0          | 0.0          |
| 952.6        | 24.4         | 69.1         | 2.1          | 1.0          | 0.0          | 0.0          |
| 396.1        | 34.0         | 59.4         | 2.7          | 1.1          | 0.0          | 0.0          |
| 1261.3       | 49.4         | 58.8         | 3.9          | 1.3          | 0.0          | 0.0          |
| 2021.9       | 85.0         | 49.4         | 3.9          | 1.5          | 0.0          | 0.0          |
| 450.2        | 221.4        | 44.8         | 7.9          | 3.7          | 0.0          | 0.0          |
| 101.0        | 1123.1       | 42.0         | 17.6         | 4.7          | 0.0          | 0.0          |
| 683.8        | 2261.9       | 29.9         | 18.1         | 0.0          | 0.0          | 0.0          |
| 435.8        |              | 26.8         | 19.9         | 0.0          | 0.0          |              |
| 51.9         |              | 24.3         | 20.1         | 0.0          | 0.0          |              |
| 125.8        |              | 20.0         | 39.2         | 0.0          | 0.0          |              |
| 399.7        |              | 19.2         | 42.7         | 0.0          | 0.0          |              |
| 515.2        |              | 17.0         | 48.9         | 0.0          | 0.0          |              |
| 1672.2       |              | 14.3         | 53.1         | 1.0          | 0.0          |              |
| 2425.8       |              | 12.6         |              | 2.9          | 0.0          |              |
| 1133.5       |              | 11.4         |              |              | 0.0          |              |
|              |              | 10.2         |              |              | 0.0          |              |
|              |              | 6.2          |              |              | 0.0          |              |
|              |              | 5.0          |              |              | 0.0          |              |
|              |              | 4.0          |              |              | 0.0          |              |
|              |              | 1.5          |              |              | 0.0          |              |
|              |              | 0.7          |              |              | 0.0          |              |
|              |              | 0.5          |              |              |              |              |
